# Supplementary material for: Rif2 protects Rap1-depleted telomeres from MRX-mediated degradation in Saccharomyces cerevisiae
Source: eLife. 2022 Jan 19;11:e74090. doi: 10.7554/eLife.74090 (PMC8791636; doi:10.7554/eLife.74090)
Supplement: Figure 1—source data 1. [file elife-74090-fig1-data1.xlsx]

## Sheet: Figure 1D
Chromatin Immunoprecipitation. Raw data
ANOVA was performed in R. In case of significative ANOVA a pairwise T-test was performed.
Rap1-ProtA
Primer	Name	Biological Replica	%Input
6Y'	untagged VII-L WT	1	0.0114794
6Y'	untagged VII-L WT	2	0.0112952
6Y'	untagged VII-L WT	3	0.0096307
6Y'	untagged VII-L Mut	1	0.0096307
6Y'	untagged VII-L Mut	2	0.02524
6Y'	untagged VII-L Mut	3	0.0109105
6Y'	Rap1-ProtA VII-L WT	1	10.3282
6Y'	Rap1-ProtA VII-L WT	2	10.4483
6Y'	Rap1-ProtA VII-L WT	3	15.1214
6Y'	Rap1-ProtA VII-L Mut	1	3.48669
6Y'	Rap1-ProtA VII-L Mut	2	7.8636
6Y'	Rap1-ProtA VII-L Mut	3	10.3282
AROI	untagged VII-L WT	1	0.00416305
AROI	untagged VII-L WT	2	0.00408681
AROI	untagged VII-L WT	3	0.0045767
AROI	untagged VII-L Mut	1	0.00692097
AROI	untagged VII-L Mut	2	0.0382567
AROI	untagged VII-L Mut	3	0.00932416
AROI	Rap1-ProtA VII-L WT	1	0.0161968
AROI	Rap1-ProtA VII-L WT	2	0.0134324
AROI	Rap1-ProtA VII-L WT	3	0.0246635
AROI	Rap1-ProtA VII-L Mut	1	0.0210776
AROI	Rap1-ProtA VII-L Mut	2	0.0203596
AROI	Rap1-ProtA VII-L Mut	3	0.0154297
URA3-3	untagged VII-L WT	1	0.0106613
URA3-3	untagged VII-L WT	2	0.0130953
URA3-3	untagged VII-L WT	3	0.00994731
URA3-3	untagged VII-L Mut	1	0.0139705
URA3-3	untagged VII-L Mut	2	0.0351221
URA3-3	untagged VII-L Mut	3	0.0123318
URA3-3	Rap1-ProtA VII-L WT	1	3.06352
URA3-3	Rap1-ProtA VII-L WT	2	3.23072
URA3-3	Rap1-ProtA VII-L WT	3	5.20004
URA3-3	Rap1-ProtA VII-L Mut	1	0.0373829
URA3-3	Rap1-ProtA VII-L Mut	2	0.585817
URA3-3	Rap1-ProtA VII-L Mut	3	0.855707
Mean %Input of Biological triplicate.
Primer	Name	mean_Percent_Input_b	Error_Percent_Input_b
6Y'	untagged VII-L WT	0.0108018	0.000587944
6Y'	untagged VII-L Mut	0.0152604	0.00500347
6Y'	Rap1-ProtA VII-L WT	11.966	1.57811
6Y'	Rap1-ProtA VII-L Mut	7.22618	2.00054
AROI	untagged VII-L WT	0.00427552	0.00015219
AROI	untagged VII-L Mut	0.0181673	0.0100686
AROI	Rap1-ProtA VII-L WT	0.0180976	0.00337858
AROI	Rap1-ProtA VII-L Mut	0.0189557	0.00177511
URA3	untagged VII-L WT	0.0112346	0.000952882
URA3	untagged VII-L Mut	0.0204748	0.00733892
URA3	Rap1-ProtA VII-L WT	3.83143	0.686007
URA3	Rap1-ProtA VII-L Mut	0.492969	0.240748
Pairwise T-test
Primer	group1	group2	p-value
6Y'	Rap1-ProtA VII-L WT	Rap1-ProtA VII-L Mut	0.0301
URA3	Rap1-ProtA VII-L WT	Rap1-ProtA VII-L Mut	0.000189

## Sheet: Figure 1F
Chromatin Immunoprecipitation. Raw data
ANOVA was performed in R. In case of significative ANOVA a pairwise T-test was performed.
Cdc13-13Myc
Primer	Name	Biological Replica	%Input
6Y'	untagged VII-L WT	1	0.0194852
6Y'	untagged VII-L WT	2	0.00286322
6Y'	untagged VII-L WT	3	0.00654763
6Y'	untagged VII-L Mut	1	0.00393848
6Y'	untagged VII-L Mut	2	0.00418233
6Y'	untagged VII-L Mut	3	0.00300557
6Y'	Cdc13-13Myc VII-L WT	1	0.0901532
6Y'	Cdc13-13Myc VII-L WT	2	0.180306
6Y'	Cdc13-13Myc VII-L WT	3	0.125161
6Y'	Cdc13-13Myc VII-L Mut	1	0.172562
6Y'	Cdc13-13Myc VII-L Mut	2	0.131384
6Y'	Cdc13-13Myc VII-L Mut	3	0.192357
AROI	untagged VII-L WT	1	0.00567377
AROI	untagged VII-L WT	2	0.00116283
AROI	untagged VII-L WT	3	0.0079501
AROI	untagged VII-L Mut	1	0.00411523
AROI	untagged VII-L Mut	2	0.00437002
AROI	untagged VII-L Mut	3	0.00351691
AROI	Cdc13-13Myc VII-L WT	1	0.00368324
AROI	Cdc13-13Myc VII-L WT	2	0.00696911
AROI	Cdc13-13Myc VII-L WT	3	0.00695302
AROI	Cdc13-13Myc VII-L Mut	1	0.00904826
AROI	Cdc13-13Myc VII-L Mut	2	0.00631
AROI	Cdc13-13Myc VII-L Mut	3	0.00613745
URA3	untagged VII-L WT	1	0.011114
URA3	untagged VII-L WT	2	0.00243565
URA3	untagged VII-L WT	3	0.0120501
URA3	untagged VII-L Mut	1	0.00424071
URA3	untagged VII-L Mut	2	0.00684147
URA3	untagged VII-L Mut	3	0.00613745
URA3	Cdc13-13Myc VII-L WT	1	0.0352033
URA3	Cdc13-13Myc VII-L WT	2	0.0739071
URA3	Cdc13-13Myc VII-L WT	3	0.0702442
URA3	Cdc13-13Myc VII-L Mut	1	0.06101
URA3	Cdc13-13Myc VII-L Mut	2	0.0533583
URA3	Cdc13-13Myc VII-L Mut	3	0.0590681
Mean %Input of Biological triplicate.
Primer	Name	mean_Percent_Input_b	Error_Percent_Input_b
6Y'	untagged VII-L WT	0.00963202	0.00504009
6Y'	untagged VII-L Mut	0.0037088	0.000358588
6Y'	Cdc13-13Myc VII-L WT	0.131874	0.0262405
6Y'	Cdc13-13Myc VII-L Mut	0.165434	0.0179587
AROI	untagged VII-L WT	0.0049289	0.0019944
AROI	untagged VII-L Mut	0.00400072	0.000252841
AROI	Cdc13-13Myc VII-L WT	0.00586846	0.00109262
AROI	Cdc13-13Myc VII-L Mut	0.00716524	0.000942827
URA3	untagged VII-L WT	0.00853325	0.00306075
URA3	untagged VII-L Mut	0.00573988	0.000776646
URA3	Cdc13-13Myc VII-L WT	0.0597849	0.0123362
URA3	Cdc13-13Myc VII-L Mut	0.0578121	0.00229639
Pairwise T-test
Primer	group1	group2	p
6Y'	Cdc13-13Myc VII-L WT	Cdc13-13Myc VII-L Mut	0.179
URA3	Cdc13-13Myc VII-L WT	Cdc13-13Myc VII-L Mut	0.835

## Sheet: Figure 1G
Chromatin Immunoprecipitation. Raw data
ANOVA was performed in R. In case of significative ANOVA a pairwise T-test was performed.
Tbf1-13Myc
Primer	Name	Biological Replica	%Input
6Y'	untagged VII-L WT	1	0.00519686
6Y'	untagged VII-L WT	2	0.00150279
6Y'	untagged VII-L WT	3	0.00628091
6Y'	untagged VII-L Mut	1	0.00281729
6Y'	untagged VII-L Mut	2	0.00390225
6Y'	untagged VII-L Mut	3	0.00909017
6Y'	Tbf1-13Myc VII-L WT	1	2.28446
6Y'	Tbf1-13Myc VII-L WT	2	2.91169
6Y'	Tbf1-13Myc VII-L WT	3	3.88664
6Y'	Tbf1-13Myc VII-L Mut	1	2.62416
6Y'	Tbf1-13Myc VII-L Mut	2	2.78663
6Y'	Tbf1-13Myc VII-L Mut	3	4.18489
AROI	untagged VII-L WT	1	0.00303348
AROI	untagged VII-L WT	2	0.000971065
AROI	untagged VII-L WT	3	0.00193318
AROI	untagged VII-L Mut	1	0.00116015
AROI	untagged VII-L Mut	2	0.00100068
AROI	untagged VII-L Mut	3	0.00437002
AROI	Tbf1-13Myc VII-L WT	1	0.0381684
AROI	Tbf1-13Myc VII-L WT	2	0.03773
AROI	Tbf1-13Myc VII-L WT	3	0.0513031
AROI	Tbf1-13Myc VII-L Mut	1	0.0418641
AROI	Tbf1-13Myc VII-L Mut	2	0.0418641
AROI	Tbf1-13Myc VII-L Mut	3	0.065996
URA3	untagged VII-L WT	1	0.010961
URA3	untagged VII-L WT	2	0.00619444
URA3	untagged VII-L WT	3	0.0134634
URA3	untagged VII-L Mut	1	0.00342074
URA3	untagged VII-L Mut	2	0.00741771
URA3	untagged VII-L Mut	3	0.0107106
URA3	Tbf1-13Myc VII-L WT	1	2.15127
URA3	Tbf1-13Myc VII-L WT	2	2.34869
URA3	Tbf1-13Myc VII-L WT	3	2.60002
URA3	Tbf1-13Myc VII-L Mut	1	1.9299
URA3	Tbf1-13Myc VII-L Mut	2	2.70418
URA3	Tbf1-13Myc VII-L Mut	3	3.23819
Mean %Input of Biological triplicate.
Primer	Name	mean_Percent_Input_b	Error_Percent_Input_b
6Y'	untagged VII-L WT	0.00432685	0.00144629
6Y'	untagged VII-L Mut	0.0052699	0.00193564
6Y'	Tbf1-13Myc VII-L WT	3.0276	0.466124
6Y'	Tbf1-13Myc VII-L Mut	3.19856	0.495389
AROI	untagged VII-L WT	0.00197924	0.000595813
AROI	untagged VII-L Mut	0.00217695	0.0010975
AROI	Tbf1-13Myc VII-L WT	0.0424005	0.00445309
AROI	Tbf1-13Myc VII-L Mut	0.049908	0.00804399
URA3	untagged VII-L WT	0.0102063	0.00213204
URA3	untagged VII-L Mut	0.00718303	0.00210768
URA3	Tbf1-13Myc VII-L WT	2.36666	0.129854
URA3	Tbf1-13Myc VII-L Mut	2.62409	0.37979
Pairwise T-test
Primer	group1	group2	p
6Y'	Tbf1-13Myc VII-L WT	Tbf1-13Myc VII-L Mut	0.731
URA3	Tbf1-13Myc VII-L WT	Tbf1-13Myc VII-L Mut	0.391
