# Supplementary material for: Rif2 protects Rap1-depleted telomeres from MRX-mediated degradation in Saccharomyces cerevisiae
Source: eLife. 2022 Jan 19;11:e74090. doi: 10.7554/eLife.74090 (PMC8791636; doi:10.7554/eLife.74090)
Supplement: Figure 2—source data 2. [file elife-74090-fig2-data2.xlsx]

## Sheet: Figure 2C
Telomere VI-R sequences obtained from the iSTEX analysis in Figure 2B were binned into groups of 10 nt in size according to telomere length before telomerase induction.
iSTEX data for the extension of wild-type telomeres were taken from previous studies (Strecker et al., 2017; Stinus et al., 2017) and included for comparison. Groups containing less than four telomeres were excluded from this analysis
Wild-type telomere
WT (Undiverged)	% Frequency
40	52.9412
50	57.6923
60	39.0244
70	33.3333
80	24.5614
90	21.875
100	19.0476
110	16.3934
120	14.5833
130	0
140	10
150	15.3846
160	0
170	0
180	0
190	0
200	0
220	0
tlc1-tm telomere
WT and MUT (Undiverged)	% Frequency
50	83.3333
60	100
70	100
80	83.3333
90	100
100	100
110	100
120	80
130	100
180	100
220	75
240	83.3333
