# Supplementary material for: Rif2 protects Rap1-depleted telomeres from MRX-mediated degradation in Saccharomyces cerevisiae
Source: eLife. 2022 Jan 19;11:e74090. doi: 10.7554/eLife.74090 (PMC8791636; doi:10.7554/eLife.74090)
Supplement: Figure 4—source data 1. [file elife-74090-fig4-data1.xlsx]

## Sheet: Figure 4A
Chromatin Immunoprecipitation. Raw data
ANOVA was performed in R. In case of significative ANOVA a pairwise T-test was performed.
Rif1-13Myc
Primer	Name	Biological Replica	%Input
6Y'	untagged VII-L WT	1	0.00536771
6Y'	untagged VII-L WT	2	0.00629544
6Y'	untagged VII-L WT	3	0.00660843
6Y'	untagged VII-L Mut	1	0.00350069
6Y'	untagged VII-L Mut	2	0.00306873
6Y'	untagged VII-L Mut	3	0.00380432
6Y'	Rif1-13Myc VII-L WT	1	0.877734
6Y'	Rif1-13Myc VII-L WT	2	1.17706
6Y'	Rif1-13Myc VII-L WT	3	1.07812
6Y'	Rif1-13Myc VII-L Mut	1	0.496038
6Y'	Rif1-13Myc VII-L Mut	2	0.43083
6Y'	Rif1-13Myc VII-L Mut	3	0.53287
AROI	untagged VII-L WT	1	0.00620877
AROI	untagged VII-L WT	2	0.00177478
AROI	untagged VII-L WT	3	0.0122183
AROI	untagged VII-L Mut	1	0.0056086
AROI	untagged VII-L Mut	2	0.00234725
AROI	untagged VII-L Mut	3	0.00500825
AROI	Rif1-13Myc VII-L WT	1	0.0112172
AROI	Rif1-13Myc VII-L WT	2	0.0136829
AROI	Rif1-13Myc VII-L WT	3	0.0201723
AROI	Rif1-13Myc VII-L Mut	1	0.024324
AROI	Rif1-13Myc VII-L Mut	2	0.0191726
AROI	Rif1-13Myc VII-L Mut	3	0.0296708
URA3	untagged VII-L WT	1	0.00834536
URA3	untagged VII-L WT	2	0.0118021
URA3	untagged VII-L WT	3	0.0127962
URA3	untagged VII-L Mut	1	0.00468367
URA3	untagged VII-L Mut	2	0.00618014
URA3	untagged VII-L Mut	3	0.00696911
URA3	Rif1-13Myc VII-L WT	1	0.317579
URA3	Rif1-13Myc VII-L WT	2	0.411374
URA3	Rif1-13Myc VII-L WT	3	0.46389
URA3	Rif1-13Myc VII-L Mut	1	0.0732272
URA3	Rif1-13Myc VII-L Mut	2	0.0441489
URA3	Rif1-13Myc VII-L Mut	3	0.069759
Mean %Input for the Biological triplicate.
Primer	Name	mean_Percent_Input_b	Error_Percent_Input_b
6Y'	untagged VII-L WT	0.00609053	0.00037253
6Y'	untagged VII-L Mut	0.00345792	0.000213423
6Y'	Rif1-13Myc VII-L WT	1.04431	0.0880471
6Y'	Rif1-13Myc VII-L Mut	0.486579	0.0298338
AROI	untagged VII-L WT	0.00673396	0.0030262
AROI	untagged VII-L Mut	0.00432137	0.00100216
AROI	Rif1-13Myc VII-L WT	0.0150242	0.00267069
AROI	Rif1-13Myc VII-L Mut	0.0243891	0.00303076
URA3	untagged VII-L WT	0.0109812	0.00134881
URA3	untagged VII-L Mut	0.00594431	0.000670203
URA3	Rif1-13Myc VII-L WT	0.397615	0.042793
URA3	Rif1-13Myc VII-L Mut	0.0623784	0.00916953
Pairwise T-test
Primer	group1	group2	p-value
6Y'	Rif1-13Myc VII-L WT	Rif1-13Myc VII-L Mut	0.000171
URA3	Rif1-13Myc VII-L WT	Rif1-13Myc VII-L Mut	2.81e-05
Rif2-13Myc
Primer	Name	Percent_Input
6Y'	untagged VII-L WT	0.00519686
6Y'	untagged VII-L WT	0.00150279
6Y'	untagged VII-L WT	0.00628091
6Y'	untagged VII-L Mut	0.00281729
6Y'	untagged VII-L Mut	0.00390225
6Y'	untagged VII-L Mut	0.00909017
6Y'	Rif2-13Myc VII-L WT	0.250322
6Y'	Rif2-13Myc VII-L WT	0.372468
6Y'	Rif2-13Myc VII-L WT	0.478035
6Y'	Rif2-13Myc VII-L Mut	0.260952
6Y'	Rif2-13Myc VII-L Mut	0.270779
6Y'	Rif2-13Myc VII-L Mut	0.211959
AROI	untagged VII-L WT	0.00303348
AROI	untagged VII-L WT	0.000971065
AROI	untagged VII-L WT	0.00193318
AROI	untagged VII-L Mut	0.00116015
AROI	untagged VII-L Mut	0.00100068
AROI	untagged VII-L Mut	0.00437002
AROI	Rif2-13Myc VII-L WT	0.00452413
AROI	Rif2-13Myc VII-L WT	0.00796849
AROI	Rif2-13Myc VII-L WT	0.0166522
AROI	Rif2-13Myc VII-L Mut	0.0165754
AROI	Rif2-13Myc VII-L Mut	0.0168068
AROI	Rif2-13Myc VII-L Mut	0.016085
URA3	untagged VII-L WT	0.010961
URA3	untagged VII-L WT	0.00619444
URA3	untagged VII-L WT	0.0134634
URA3	untagged VII-L Mut	0.00342074
URA3	untagged VII-L Mut	0.00741771
URA3	untagged VII-L Mut	0.0107106
URA3	Rif2-13Myc VII-L WT	1.71141
URA3	Rif2-13Myc VII-L WT	1.89018
URA3	Rif2-13Myc VII-L WT	2.23229
URA3	Rif2-13Myc VII-L Mut	2.14135
URA3	Rif2-13Myc VII-L Mut	1.60791
URA3	Rif2-13Myc VII-L Mut	2.05412
Mean %Input for the Biological triplicate.
Primer	Name	mean_Percent_Input_b	Error_Percent_Input_b
6Y'	untagged VII-L WT	0.00432685	0.00144629
6Y'	untagged VII-L Mut	0.0052699	0.00193564
6Y'	Rif2-13Myc VII-L WT	0.366942	0.0657933
6Y'	Rif2-13Myc VII-L Mut	0.247897	0.0181915
AROI	untagged VII-L WT	0.00197924	0.000595813
AROI	untagged VII-L Mut	0.00217695	0.0010975
AROI	Rif2-13Myc VII-L WT	0.00971494	0.00360833
AROI	Rif2-13Myc VII-L Mut	0.0164891	0.000212806
URA3	untagged VII-L WT	0.0102063	0.00213204
URA3	untagged VII-L Mut	0.00718303	0.00210768
URA3	Rif2-13Myc VII-L WT	1.94463	0.152808
URA3	Rif2-13Myc VII-L Mut	1.93446	0.165205
Pairwise T-test
Primer	group1	group2	p-value
6Y'	Rif2-13Myc VII-L WT	Rif2-13Myc VII-L Mut	0.234
URA3	Rif2-13Myc VII-L WT	Rif2-13Myc VII-L Mut	1
Sir3-ProtA
Primer	Name	Percent_Input
6Y'	untagged VII-L WT	0.0171798
6Y'	untagged VII-L WT	0.0172394
6Y'	untagged VII-L WT	0.016768
6Y'	untagged VII-L Mut	0.0267718
6Y'	untagged VII-L Mut	0.0207155
6Y'	untagged VII-L Mut	0.0133396
6Y'	Sir3-ProtA VII-L WT	0.520098
6Y'	Sir3-ProtA VII-L WT	0.457504
6Y'	Sir3-ProtA VII-L WT	0.53472
6Y'	Sir3-ProtA VII-L Mut	0.587172
6Y'	Sir3-ProtA VII-L Mut	0.516506
6Y'	Sir3-ProtA VII-L Mut	0.579089
AROI	untagged VII-L WT	0.00230161
AROI	untagged VII-L WT	0.000921873
AROI	untagged VII-L WT	0.000434564
AROI	untagged VII-L Mut	0.0101446
AROI	untagged VII-L Mut	0.00389775
AROI	untagged VII-L Mut	0.00211791
AROI	Sir3-ProtA VII-L WT	0.000759247
AROI	Sir3-ProtA VII-L WT	0.00196924
AROI	Sir3-ProtA VII-L WT	0.00841312
AROI	Sir3-ProtA VII-L Mut	0.0153231
AROI	Sir3-ProtA VII-L Mut	0.0233062
AROI	Sir3-ProtA VII-L Mut	0.0122324
URA3	untagged VII-L WT	0.0312902
URA3	untagged VII-L WT	0.0330743
URA3	untagged VII-L WT	0.020219
URA3	untagged VII-L Mut	0.0489298
URA3	untagged VII-L Mut	0.031182
URA3	untagged VII-L Mut	0.0159186
URA3	Sir3-ProtA VII-L WT	0.587172
URA3	Sir3-ProtA VII-L WT	0.410899
URA3	Sir3-ProtA VII-L WT	0.83327
URA3	Sir3-ProtA VII-L Mut	0.425389
URA3	Sir3-ProtA VII-L Mut	0.419533
URA3	Sir3-ProtA VII-L Mut	0.681533
Mean %Input for the Biological triplicate.
Primer	Name	mean_Percent_Input_b	Error_Percent_Input_b
6Y'	untagged VII-L WT	0.0170624	0.000148201
6Y'	untagged VII-L Mut	0.0202756	0.00388377
6Y'	Sir3-ProtA VII-L WT	0.504108	0.023681
6Y'	Sir3-ProtA VII-L Mut	0.560922	0.0223306
AROI	untagged VII-L WT	0.00121935	0.000559115
AROI	untagged VII-L Mut	0.00538675	0.00243378
AROI	Sir3-ProtA VII-L WT	0.00371387	0.00237545
AROI	Sir3-ProtA VII-L Mut	0.0169539	0.00329906
URA3	untagged VII-L WT	0.0281945	0.00402088
URA3	untagged VII-L Mut	0.0320101	0.0095385
URA3	Sir3-ProtA VII-L WT	0.610447	0.122482
URA3	Sir3-ProtA VII-L Mut	0.508819	0.0863739
Pairwise T-test
Primer	group1	group2	p-value
6Y'	Sir3-ProtA VII-L WT	Sir3-ProtA VII-L Mut	0.239
URA3	Sir3-ProtA VII-L WT	Sir3-ProtA VII-L Mut	1
Sir4-Myc13
Primer	Name	Percent_Input
6Y'	untagged VII-L WT	0.00258048
6Y'	untagged VII-L WT	0.00695302
6Y'	untagged VII-L WT	0.0143964
6Y'	untagged VII-L Mut	0.00348858
6Y'	untagged VII-L Mut	0.00712377
6Y'	untagged VII-L Mut	0.00503726
6Y'	Sir4-13Myc VII-L WT	1.7494
6Y'	Sir4-13Myc VII-L WT	2.45693
6Y'	Sir4-13Myc VII-L WT	1.02233
6Y'	Sir4-13Myc VII-L Mut	0.551662
6Y'	Sir4-13Myc VII-L Mut	0.490341
6Y'	Sir4-13Myc VII-L Mut	0.931002
AROI	untagged VII-L WT	0.00237453
AROI	untagged VII-L WT	0.0050723
AROI	untagged VII-L WT	0.0156451
AROI	untagged VII-L Mut	0.00407737
AROI	untagged VII-L Mut	0.00609506
AROI	untagged VII-L Mut	0.00466747
AROI	Sir4-13Myc VII-L WT	0.0111012
AROI	Sir4-13Myc VII-L WT	0.117592
AROI	Sir4-13Myc VII-L WT	0.0118979
AROI	Sir4-13Myc VII-L Mut	0.00790432
AROI	Sir4-13Myc VII-L Mut	0.0116128
AROI	Sir4-13Myc VII-L Mut	0.00874004
URA3	untagged VII-L WT	0.00514311
URA3	untagged VII-L WT	0.0108351
URA3	untagged VII-L WT	0.0208596
URA3	untagged VII-L Mut	0.00558919
URA3	untagged VII-L Mut	0.00997032
URA3	untagged VII-L Mut	0.00923838
URA3	Sir4-13Myc VII-L WT	2.12411
URA3	Sir4-13Myc VII-L WT	2.19901
URA3	Sir4-13Myc VII-L WT	1.45081
URA3	Sir4-13Myc VII-L Mut	0.595369
URA3	Sir4-13Myc VII-L Mut	0.679175
URA3	Sir4-13Myc VII-L Mut	0.53844
Mean %Input for the Biological triplicate.
Primer	Name	mean_Percent_Input_b	Error_Percent_Input_b
6Y'	untagged VII-L WT	0.00797665	0.00344916
6Y'	untagged VII-L Mut	0.00521654	0.00105321
6Y'	Sir4-13Myc VII-L WT	1.74288	0.414147
6Y'	Sir4-13Myc VII-L Mut	0.657668	0.137809
AROI	untagged VII-L WT	0.00769732	0.00404949
AROI	untagged VII-L Mut	0.00494663	0.000598947
AROI	Sir4-13Myc VII-L WT	0.0468636	0.0353647
AROI	Sir4-13Myc VII-L Mut	0.00941904	0.00112308
URA3	untagged VII-L WT	0.0122793	0.00459407
URA3	untagged VII-L Mut	0.00826597	0.00135496
URA3	Sir4-13Myc VII-L WT	1.92464	0.237902
URA3	Sir4-13Myc VII-L Mut	0.604328	0.0408732
Pairwise T-test
Primer	group1	group2	p-value
6Y'	Sir4-13Myc VII-L WT	Sir4-13Myc VII-L Mut	0.0473
URA3	Sir4-13Myc VII-L WT	Sir4-13Myc VII-L Mut	0.000334

## Sheet: Figure 4B
qPCR. Raw data
ANOVA was performed in R. In case of significative ANOVA a pairwise T-test was performed.
Name	Biological replica	Technical replica	Cq (Actin )	Cq 1L	Cq 15L
wild-type	1	1	12.37	25.26	25.11
wild-type	1	2	12.4	24.98	25.98
wild-type	2	1	12.23	25.7	26.46
wild-type	2	2	12.22	25.53	26.11
wild-type	3	1	12.14	25.27	25.51
wild-type	3	2	12.11	25.23	25.82
tlc1-tm	1	1	12.36	25.6	25.07
tlc1-tm	1	2	12.35	25.47	25.6
tlc1-tm	2	1	12.04	25.49	25.96
tlc1-tm	2	2	12.05	25.6	25.85
tlc1-tm	3	1	12.1	25.07	25.31
tlc1-tm	3	2	12.12	25.03	24.86
ΔCP_mean for biological triplicate. Fold change relative to wild-type values.
Name	Primer	ΔCq_mean	SEM	FoldChange	SEM_FC
wild-type	1L	13.0833	0.190226	1	0.136086
wild-type	15L	13.5867	0.260853	1	0.180083
tlc1-tm	1L	13.2067	0.162207	0.918064	0.102605
tlc1-tm	15L	13.2717	0.29417	1.24401	0.232663
Pairwise T-test
Primer	group1	group2	p-value
1L	wild-type	tlc1-tm	0.632
15L	wild-type	tlc1-tm	0.426

## Sheet: Figure 4D
qPCR. Raw data
ANOVA was performed in R. In case of significative ANOVA a pairwise T-test was performed.
Name	Biological Replica	Technical replica	Cq (Actin)	Cq (URA3)	∆Cq	∆Cq_expression
VII-L Wild-type	1	1	15.49	20.67	5.18	0.0275845
VII-L Wild-type	1	2	15.29	20.61	5.32	0.0250334
VII-L Wild-type	1	3	14.7	19.81	5.11	0.0289559
VII-L Wild-type	2	1	15.2	20.19	4.99	0.0314674
VII-L Wild-type	2	2	14.7	20.16	5.46	0.0227183
VII-L Wild-type	2	3	14.25	19.6	5.35	0.0245183
VII-L Wild-type	3	1	15.1	20.43	5.33	0.0248605
VII-L Wild-type	3	2	14.89	19.87	4.98	0.0316862
VII-L Wild-type	3	3	14.01	19.43	5.42	0.023357
VII-L tlc1-tm	1	1	15.44	20.62	5.18	0.0275845
VII-L tlc1-tm	1	2	15.31	20.5	5.19	0.0273939
VII-L tlc1-tm	1	3	14.44	19.84	5.4	0.0236831
VII-L tlc1-tm	2	1	15.31	20.64	5.33	0.0248605
VII-L tlc1-tm	2	2	14.93	20.45	5.52	0.0217929
VII-L tlc1-tm	2	3	14.42	19.59	5.17	0.0277763
VII-L tlc1-tm	3	1	15.33	20.48	5.15	0.0281641
VII-L tlc1-tm	3	2	15.24	20.42	5.18	0.0275845
VII-L tlc1-tm	3	3	14.95	19.55	4.6	0.0412346
VII-L Wild-type sir2∆	1	1	15.54	18.86	3.32	0.100134
VII-L Wild-type sir2∆	1	2	15.34	18.76	3.42	0.0934281
VII-L Wild-type sir2∆	1	3	14.57	18.62	4.05	0.060371
VII-L Wild-type sir2∆	2	1	16.17	19.49	3.32	0.100134
VII-L Wild-type sir2∆	2	2	15.46	19.47	4.01	0.0620683
VII-L Wild-type sir2∆	2	3	15.18	18.96	3.78	0.0727958
VII-L Wild-type sir2∆	3	1	15.61	19.61	4	0.0625
VII-L Wild-type sir2∆	3	2	15.61	19.51	3.9	0.0669858
VII-L Wild-type sir2∆	3	3	15.07	18.74	3.67	0.0785633
VII-L tlc1-tm sir2∆	1	1	15.68	20.22	4.54	0.0429857
VII-L tlc1-tm sir2∆	1	2	15.66	19.06	3.4	0.0947323
VII-L tlc1-tm sir2∆	1	3	15.09	18.2	3.11	0.115824
VII-L tlc1-tm sir2∆	2	1	15.84	19.6	3.76	0.073812
VII-L tlc1-tm sir2∆	2	2	15.78	19.57	3.79	0.072293
VII-L tlc1-tm sir2∆	2	3	15.15	18.78	3.63	0.0807721
VII-L tlc1-tm sir2∆	3	1	16.19	19.63	3.44	0.0921418
VII-L tlc1-tm sir2∆	3	2	15.6	19.51	3.91	0.0665231
VII-L tlc1-tm sir2∆	3	3	15	18.89	3.89	0.0674518
Mean ΔCP_expression for biological triplicate.
Name	mean_delta_Cq_exp_b	SD_delta_Cq_exp_b	Error_delta_Cq_exp_b
VII-L WT	0.0266868	0.000480442	0.000277384
VII-L Mut	0.027786	0.00399595	0.00230706
VII-L Wild-type sir2∆	0.0774422	0.00768606	0.00443755
VII-L tlc1-tm sir2∆	0.0785039	0.00520627	0.00300584
Pairwise T-test
group1	group2	p-value
VII-L WT	VII-L Mut	1
VII-L WT sir2∆	VII-L Mut sir2∆	1
