# Supplementary material for: Rif2 protects Rap1-depleted telomeres from MRX-mediated degradation in Saccharomyces cerevisiae
Source: eLife. 2022 Jan 19;11:e74090. doi: 10.7554/eLife.74090 (PMC8791636; doi:10.7554/eLife.74090)
Supplement: Figure 6—source data 1. [file elife-74090-fig6-data1.xlsx]

## Sheet: Figure 6A
Chromatin Immunoprecipitation. Raw data
ANOVA was performed in R. In case of significative ANOVA a pairwise T-test was performed.
Mre11-13Myc
Primer	Name	Biological Replica	%Input
6Y'	untagged VII-L WT	1	0.00204577
6Y'	untagged VII-L WT	2	0.00381753
6Y'	untagged VII-L WT	3	0.0135727
6Y'	untagged VII-L Mut	1	0.00260745
6Y'	untagged VII-L Mut	2	0.00541755
6Y'	untagged VII-L Mut	3	0.00288314
6Y'	Mre11-13Myc VII-L WT	1	0.0427437
6Y'	Mre11-13Myc VII-L WT	2	0.0316173
6Y'	Mre11-13Myc VII-L WT	3	0.0445589
6Y'	Mre11-13Myc VII-L Mut	1	0.273926
6Y'	Mre11-13Myc VII-L Mut	2	0.332599
6Y'	Mre11-13Myc VII-L Mut	3	0.165724
AROI	untagged VII-L WT	1	0.000357903
AROI	untagged VII-L WT	2	0.00218501
AROI	untagged VII-L WT	3	0.00976514
AROI	untagged VII-L Mut	1	0.00234997
AROI	untagged VII-L Mut	2	0.00517888
AROI	untagged VII-L Mut	3	0.00287316
AROI	Mre11-13Myc VII-L WT	1	0.0106121
AROI	Mre11-13Myc VII-L WT	2	0.00457141
AROI	Mre11-13Myc VII-L WT	3	0.0172993
AROI	Mre11-13Myc VII-L Mut	1	0.0144966
AROI	Mre11-13Myc VII-L Mut	2	0.00870981
AROI	Mre11-13Myc VII-L Mut	3	0.013065
URA3	untagged VII-L WT	1	0.00479869
URA3	untagged VII-L WT	2	0.013065
URA3	untagged VII-L WT	3	0.0210047
URA3	untagged VII-L Mut	1	0.00676289
URA3	untagged VII-L Mut	2	0.00979904
URA3	untagged VII-L Mut	3	0.00545523
URA3	Mre11-13Myc VII-L WT	1	0.0356948
URA3	Mre11-13Myc VII-L WT	2	0.0225904
URA3	Mre11-13Myc VII-L WT	3	0.0355713
URA3	Mre11-13Myc VII-L Mut	1	0.183883
URA3	Mre11-13Myc VII-L Mut	2	0.209041
URA3	Mre11-13Myc VII-L Mut	3	0.10096
Mean %Input of Biological triplicate.
Primer	Name	mean_Percent_Input_b	Error_Percent_Input_b
6Y'	untagged VII-L WT	0.00647868	0.00358372
6Y'	untagged VII-L Mut	0.00363605	0.0008943
6Y'	Mre11-13Myc VII-L WT	0.0396399	0.00404542
6Y'	Mre11-13Myc VII-L Mut	0.257416	0.0488748
AROI	untagged VII-L WT	0.00410268	0.00287994
AROI	untagged VII-L Mut	0.00346734	0.000868998
AROI	Mre11-13Myc VII-L WT	0.0108276	0.0036758
AROI	Mre11-13Myc VII-L Mut	0.0120905	0.00174012
URA3	untagged VII-L WT	0.0129561	0.00467859
URA3	untagged VII-L Mut	0.00733905	0.00128662
URA3	Mre11-13Myc VII-L WT	0.0312855	0.00434767
URA3	Mre11-13Myc VII-L Mut	0.164628	0.0326518
Pairwise T-test
Primer	group1	group2	p-value
6Y'	Mre11-13Myc VII-L WT	Mre11-13Myc VII-L Mut	0.00145
URA3	Mre11-13Myc VII-L WT	Mre11-13Myc VII-L Mut	0.00284

## Sheet: Figure 6C
Chromatin Immunoprecipitation. Raw data
ANOVA was performed in R. In case of significative ANOVA a pairwise T-test was performed.
Yku70-13Myc
Primer	Name	Biological Replica	%Input
6Y'	untagged VII-L WT	1	0.00204577
6Y'	untagged VII-L WT	2	0.00381753
6Y'	untagged VII-L WT	3	0.0135727
6Y'	untagged VII-L Mut	1	0.00260745
6Y'	untagged VII-L Mut	2	0.00541755
6Y'	untagged VII-L Mut	3	0.00288314
6Y'	Yku70-13Myc VII-L WT	1	3.03534
6Y'	Yku70-13Myc VII-L WT	2	3.34465
6Y'	Yku70-13Myc VII-L WT	3	2.94212
6Y'	Yku70-13Myc VII-L Mut	1	3.14238
6Y'	Yku70-13Myc VII-L Mut	2	4.44399
6Y'	Yku70-13Myc VII-L Mut	3	2.69794
AROI	untagged VII-L WT	1	0.000357903
AROI	untagged VII-L WT	2	0.00218501
AROI	untagged VII-L WT	3	0.00976514
AROI	untagged VII-L Mut	1	0.00234997
AROI	untagged VII-L Mut	2	0.00517888
AROI	untagged VII-L Mut	3	0.00287316
AROI	Yku70-13Myc VII-L WT	1	0.0140028
AROI	Yku70-13Myc VII-L WT	2	0.0230651
AROI	Yku70-13Myc VII-L WT	3	0.0283965
AROI	Yku70-13Myc VII-L Mut	1	0.0123175
AROI	Yku70-13Myc VII-L Mut	2	0.0206439
AROI	Yku70-13Myc VII-L Mut	3	0.0144966
URA3	untagged VII-L WT	1	0.00479869
URA3	untagged VII-L WT	2	0.013065
URA3	untagged VII-L WT	3	0.0210047
URA3	untagged VII-L Mut	1	0.00676289
URA3	untagged VII-L Mut	2	0.00979904
URA3	untagged VII-L Mut	3	0.00545523
URA3	Yku70-13Myc VII-L WT	1	1.52822
URA3	Yku70-13Myc VII-L WT	2	2.04465
URA3	Yku70-13Myc VII-L WT	3	1.54956
URA3	Yku70-13Myc VII-L Mut	1	0.927781
URA3	Yku70-13Myc VII-L Mut	2	1.52822
URA3	Yku70-13Myc VII-L Mut	3	1.1622
Mean %Input of Biological triplicate.
Primer	Name	mean_Percent_Input_b	Error_Percent_Input_b
6Y'	untagged VII-L WT	0.00647868	0.00358372
6Y'	untagged VII-L Mut	0.00363605	0.0008943
6Y'	Yku70-13Myc VII-L WT	3.10737	0.121655
6Y'	Yku70-13Myc VII-L Mut	3.4281	0.523898
AROI	untagged VII-L WT	0.00410268	0.00287994
AROI	untagged VII-L Mut	0.00346734	0.000868998
AROI	Yku70-13Myc VII-L WT	0.0218215	0.00420138
AROI	Yku70-13Myc VII-L Mut	0.0158193	0.00249294
URA3	untagged VII-L WT	0.0129561	0.00467859
URA3	untagged VII-L Mut	0.00733905	0.00128662
URA3	Yku70-13Myc VII-L WT	1.70748	0.1687
URA3	Yku70-13Myc VII-L Mut	1.20607	0.174715
Pairwise T-test
Primer	group1	group2	p-value
6Y'	Yku70-13Myc VII-L WT	Yku70-13Myc VII-L Mut	1
URA3	Yku70-13Myc VII-L WT	Yku70-13Myc VII-L Mut	0.116
