# Supplementary material for: Rif2 protects Rap1-depleted telomeres from MRX-mediated degradation in Saccharomyces cerevisiae
Source: eLife. 2022 Jan 19;11:e74090. doi: 10.7554/eLife.74090 (PMC8791636; doi:10.7554/eLife.74090)
Supplement: Figure 7—source data 2. [file elife-74090-fig7-data2.xlsx]

## Sheet: Figure 7C
Chromatin Immunoprecipitation. Raw data
ANOVA was performed in R. In case of significative ANOVA a pairwise T-test was performed.
Rif2-13Myc III-ITS
Primer	Name	Biological Replica	%Input
6Y'	untagged III-ITS WT	1	0.00245827
6Y'	untagged III-ITS WT	2	0.00626642
6Y'	untagged III-ITS WT	3	0.00364935
6Y'	untagged III-ITS MUT	1	0.00275612
6Y'	untagged III-ITS MUT	2	0.00864964
6Y'	untagged III-ITS MUT	3	0.0052149
6Y'	Rif2-13Myc III-ITS WT	1	0.29055
6Y'	Rif2-13Myc III-ITS WT	2	0.383382
6Y'	Rif2-13Myc III-ITS WT	3	0.462286
6Y'	Rif2-13Myc III-ITS MUT	1	0.449644
6Y'	Rif2-13Myc III-ITS MUT	2	0.390084
6Y'	Rif2-13Myc III-ITS MUT	3	0.42099
AROI	untagged III-ITS WT	1	0.00558919
AROI	untagged III-ITS WT	2	0.0119807
AROI	untagged III-ITS WT	3	0.00923838
AROI	untagged III-ITS MUT	1	0.0112561
AROI	untagged III-ITS MUT	2	0.0160293
AROI	untagged III-ITS MUT	3	0.0132934
AROI	Rif2-13Myc III-ITS WT	1	0.0253276
AROI	Rif2-13Myc III-ITS WT	2	0.0251527
AROI	Rif2-13Myc III-ITS WT	3	0.0340042
AROI	Rif2-13Myc III-ITS MUT	1	0.0379924
AROI	Rif2-13Myc III-ITS MUT	2	0.0433404
AROI	Rif2-13Myc III-ITS MUT	3	0.0257704
URA3	untagged III-ITS WT	1	0.00680993
URA3	untagged III-ITS WT	2	0.00883139
URA3	untagged III-ITS WT	3	0.00719822
URA3	untagged III-ITS MUT	1	0.00599035
URA3	untagged III-ITS MUT	2	0.0123603
URA3	untagged III-ITS MUT	3	0.00823998
URA3	Rif2-13Myc III-ITS WT	1	0.110098
URA3	Rif2-13Myc III-ITS WT	2	0.188398
URA3	Rif2-13Myc III-ITS WT	3	0.177004
URA3	Rif2-13Myc III-ITS MUT	1	0.0318372
URA3	Rif2-13Myc III-ITS MUT	2	0.0366983
URA3	Rif2-13Myc III-ITS MUT	3	0.0450246
Mean %Input of Biological triplicate.
Primer	Name	mean_Percent_Input_b	Error_Percent_Input_b
6Y'	untagged III-ITS WT	0.00412468	0.00112472
6Y'	untagged III-ITS MUT	0.00554022	0.00170907
6Y'	Rif2-13Myc III-ITS WT	0.378739	0.0496302
6Y'	Rif2-13Myc III-ITS MUT	0.420239	0.0171977
AROI	untagged III-ITS WT	0.00893609	0.00185125
AROI	untagged III-ITS MUT	0.0135263	0.00138281
AROI	Rif2-13Myc III-ITS WT	0.0281615	0.00292178
AROI	Rif2-13Myc III-ITS MUT	0.0357011	0.00519982
URA3	untagged III-ITS WT	0.00761318	0.000619332
URA3	untagged III-ITS MUT	0.00886354	0.00186509
URA3	Rif2-13Myc III-ITS WT	0.1585	0.0244236
URA3	Rif2-13Myc III-ITS MUT	0.0378533	0.00385043
Pairwise T-test
Primer	group1	group2	p-value
6Y'	Rif2-13Myc III-ITS WT	Rif2-13Myc III-ITS MUT	1
URA3	Rif2-13Myc III-ITS WT	Rif2-13Myc III-ITS MUT	0.000763

## Sheet: Figure 7D
Chromatin Immunoprecipitation. Raw data
ANOVA was performed in R. In case of significative ANOVA a pairwise T-test was performed.
Rif2-13Myc rad50∆
Primer	Name	Percent_Input
6Y'	untagged rad50∆ WT	0.0189305
6Y'	untagged rad50∆ WT	0.00457141
6Y'	untagged rad50∆ WT	0.00483207
6Y'	untagged rad50∆ tlc1-tm	0.00489952
6Y'	untagged rad50∆ tlc1-tm	0.00366202
6Y'	untagged rad50∆ tlc1-tm	0.00483207
6Y'	Rif2-13Myc rad50∆ WT	0.425389
6Y'	Rif2-13Myc rad50∆ WT	0.309252
6Y'	Rif2-13Myc rad50∆ WT	0.356471
6Y'	Rif2-13Myc rad50∆ tlc1-tm	0.00446185
6Y'	Rif2-13Myc rad50∆ tlc1-tm	0.00463523
6Y'	Rif2-13Myc rad50∆ tlc1-tm	0.00395216
AROI	untagged rad50∆ WT	0.016768
AROI	untagged rad50∆ WT	0.00752995
AROI	untagged rad50∆ WT	0.00692897
AROI	untagged rad50∆ tlc1-tm	0.00702569
AROI	untagged rad50∆ tlc1-tm	0.00793176
AROI	untagged rad50∆ tlc1-tm	0.00712377
AROI	Rif2-13Myc rad50∆ WT	0.053916
AROI	Rif2-13Myc rad50∆ WT	0.0341222
AROI	Rif2-13Myc rad50∆ WT	0.0434909
AROI	Rif2-13Myc rad50∆ tlc1-tm	0.0103578
AROI	Rif2-13Myc rad50∆ tlc1-tm	0.00841312
AROI	Rif2-13Myc rad50∆ tlc1-tm	0.00763507
URA3	untagged rad50∆ WT	0.0254156
URA3	untagged rad50∆ WT	0.0123603
URA3	untagged rad50∆ WT	0.00953109
URA3	untagged rad50∆ tlc1-tm	0.00907967
URA3	untagged rad50∆ tlc1-tm	0.0132016
URA3	untagged rad50∆ tlc1-tm	0.00966413
URA3	Rif2-13Myc rad50∆ WT	0.218674
URA3	Rif2-13Myc rad50∆ WT	0.15197
URA3	Rif2-13Myc rad50∆ WT	0.161192
URA3	Rif2-13Myc rad50∆ tlc1-tm	0.0110628
URA3	Rif2-13Myc rad50∆ tlc1-tm	0.0119807
URA3	Rif2-13Myc rad50∆ tlc1-tm	0.0083261
Primer	Name	mean_Percent_Input_b	Error_Percent_Input_b
6Y'	untagged rad50∆ WT	0.00944466	0.00474352
6Y'	untagged rad50∆ tlc1-tm	0.00446454	0.000401729
6Y'	Rif2-13Myc rad50∆ WT	0.363704	0.0337204
6Y'	Rif2-13Myc rad50∆ tlc1-tm	0.00434974	0.000204997
AROI	untagged rad50∆ WT	0.010409	0.00318425
AROI	untagged rad50∆ tlc1-tm	0.00736041	0.000287075
AROI	Rif2-13Myc rad50∆ WT	0.043843	0.00571667
AROI	Rif2-13Myc rad50∆ tlc1-tm	0.00880198	0.000809667
URA3	untagged rad50∆ WT	0.015769	0.00489195
URA3	untagged rad50∆ tlc1-tm	0.0106485	0.00128767
URA3	Rif2-13Myc rad50∆ WT	0.177279	0.0208683
URA3	Rif2-13Myc rad50∆ tlc1-tm	0.0104565	0.00109768
Primer	group1	group2	p-value
6Y'	Rif2-13Myc rad50∆ WT	Rif2-13Myc rad50∆ tlc1-tm	2.41e-06
URA3	Rif2-13Myc rad50∆ WT	Rif2-13Myc rad50∆ tlc1-tm	2.54e-05
